# Supplementary material for: How Can We Mitigate Power Imbalances in Collaborative Environmental Governance? Examining the Role of the Village Facilitation Team Approach Observed in West Kalimantan, Indonesia
Source: Preprints.org preprint supplement (doi:10.20944/preprints202101.0633.v1), 2021-01-29
Supplement: Supplementary file 3 [file supplementary]

## Sheet: Sheet1
Appendix: Questionnaire Survey Results.
No.	All/ VFT1	Questions	Percentage of Respondents
			4: Strongly agree	3: Agree	2: Disagree	1: Strongly disagree
1	VFT	At the beginning of the facilitation training, I felt nervous because I was not confident in my knowledge and skills, compared to the other participants, particularly district government officers.	0.138	0.655	0.172	0.034
2	All	At the early stages of the VFT meetings, I felt nervous because I didn't have enough knowledge and skills compared to the other participants, particularly district government officers.	0.06	0.61	0.32	0.01
3	All	At the early stages of the VFT meetings, I felt nervous because there were some people whom I didn't know well, particularly the district government officers.	0.145	0.62	0.22	0.015
4	VFT	During the facilitation training, all the participants had equal opportunities to obtain knowledge and skills.	0.483	0.517	0	0
5	VFT	Through the facilitation training, I could obtain abundant new knowledge and practical skills.	0.276	0.724	0	0
6	VFT	In case some participants had difficulties in keeping up with the training program, appropriate support was provided by the trainers.	0.207	0.586	0.207	0
7	VFT	At the end of the facilitation training, there were little gaps in knowledge or skills among participants.	0.241	0.552	0.207	0
8	All	During the VFT meetings, information and knowledge were equally shared with all participants.	0.25	0.73	0.02	0
9	All	In case some participants had difficulties in understanding the contents of the discussions, appropriate support was provided by VFT members.	0.145	0.76	0.095	0
10	All	I understood almost everything regarding the topics discussed during VFT meetings.	0.05	0.59	0.36	0
11	All	At the later stages of VFT meetings, there were little gaps in knowledge or skills among participants.	0.03	0.72	0.245	0.005
12	All	At the later stages of VFT meetings, I could express my opinions freely, without being nervous.	0.065	0.725	0.21	0
13	All	Because some village representatives facilitated the meetings as VFT members, I felt comfortable in expressing my opinions.	0.06	0.885	0.055	0
14	All	I participated in VFT meetings to obtain useful information or knowledge related to my livelihood.	0.275	0.695	0.03	0
15	All	I participated in VFT meetings because I was afraid to miss the opportunity to obtain important information.	0.25	0.625	0.125	0
16	All	I participated in VFT meetings to maintain good relationships with friends, neighbors, family members, relatives, village representatives, or other villagers.	0.365	0.635	0	0
17	All	Before joining VFT meetings, I did not experience conflicts with other participants.	0.4	0.59	0	0.01
18	VFT	Through joining the facilitation training, I could get to know each other better with the other participants.	0.448	0.552	0	0	0
19	VFT	At the end of the facilitation training, I was able to build mutual trust with other participants.	0.276	0.586	0.138	0
20	All	The trainings for non-burning agriculture techniques (e.g. organic fertilizers, organic pesticides) strengthened relationships between VFT members (including district officers) and other participants.	0.58	0.42	0	0
21	All	VFT meetings were open to anybody who was interested in joining the discussions.	0.09	0.625	0.285	0
22	All	During VFT meetings, most participants joined the discussions actively.	0.09	0.865	0.04	0.005
23	All	All participants were treated equally during VFT meetings.	0.145	0.84	0.015	0
24	All	During VFT meetings, all participants' opinions were listened to and respected by other participants.	0.355	0.635	0.01	0
25	All	Participants of VFT meetings made efforts to respect other participants' opinions even if they differed from their own opinions.	0.15	0.725	0.125	0
26	All	VFT members made effots to build consensus by combining all participants' opinions.	0.275	0.715	0.01	0
27	All	Decisions regarding the topics of VFT meetings were made when most participants attended meetings.	0.2	0.66	0.14	0
28	All	Most important decisions were made by villagers, not by VFT members.	0.105	0.56	0.325	0.01
29	All	There were clear rules regarding how to participate in discussions during VFT meetings.	0.05	0.545	0.405	0
30	VFT	During the facilitation training, all the participants had equal opportunities to obtain knowledge and skills.	0.482759	0.517241	0	0
31	VFT	Through the facilitation training, I could obtain abundant new knowledge and practical skills.	0.275862	0.724138	0	0
32	VFT	Through joining the facilitation training, I could obtain skills on how to combine different people’s ideas and build a consensus.	0.207	0.69	0.103	0
33	VFT	At the end of the facilitation training, there were little gaps in knowledge or skills among participants.	0.241379	0.551724	0.206897	0
34	All	Trainings on non-burning agriculture techniques (e.g. organic fertilizers, organic pesticides, etc.) provided ideas regarding ways to tackle the issue of fire.	0.19	0.71	0.1	0
1 All: All survey respondents’ perceptions on VFT meetings; VFT: Village Facilitation Team (VFT) members' perceptions on the facilitation training

## Sheet: Sheet2
		Percentage of Respondents
		4: Strongly agree	3: Agree	2: Disagree	1: Strongly disagree
	At the later stages of the Village Facilitation Team meetings, there were little gaps in knowledge or skills among participants.	0.03	0.72	0.245	0.005
		Percentage of Respondents
		4: Strongly agree	3: Agree	2: Disagree	1: Strongly disagree
	At the later stages of the Village Facilitation Team meetings, I could express my opinions freely, without being nervous.	0.065	0.725	0.21	0
		Percentage of Respondents
		4: Strongly agree	3: Agree	2: Disagree	1: Strongly disagree
	At the early stages of the Village Facilitation Team meetings, I felt nervous because there were some people whom I didn't know well (i.e. district officers).	0.145	0.62	0.22	0.015
		Percentage of Respondents
		4: Strongly agree	3: Agree	2: Disagree	1: Strongly disagree
	At the early stages of the Village Facilitation Team meetings, I felt nervous because I didn't have enough knowledge and skills compared to other participants (i.e. district officers).	0.06	0.61	0.32	0.01
		Percentage of Respondents
		4: Strongly agree	3: Agree	2: Disagree	1: Strongly disagree
	In case some participants had difficulties in understanding the contents of the discussions, appropriate support was provided by Village Facilitation Team members.	0.145	0.76	0.095	0
		Percentage of Respondents
		4: Strongly agree	3: Agree	2: Disagree	1: Strongly disagree
	Because some village representatives facilitated the meetings as Village Facilitation Team members, I felt comfortable in expressing my opinions.	0.06	0.885	0.055	0
